# Supplementary material for: A critical role of mevalonate for peptidoglycan synthesis in Staphylococcus aureus
Source: PubMed Central journal article supplement (PMC4790635; doi:10.1038/srep22894), 2016-03-10
Supplement: srep22894-s1.pdf [file srep22894-s1.pdf]

**Supplementary Information**

**A critical role of mevalonate for peptidoglycan synthesis in *Staphylococcus aureus***

**Yasuhiko Matsumoto<sup>1,2</sup>, Jyunichiro Yasukawa<sup>1,2</sup>, Masaki Ishii<sup>1,2</sup>, Yohei Hayashi<sup>2</sup>,  
Shinya Miyazaki<sup>2</sup>, and Kazuhisa Sekimizu<sup>2</sup>**

<sup>1</sup>These authors contributed equally to this work.

<sup>2</sup>Laboratory of Microbiology, Graduate School of Pharmaceutical Sciences, The University of  
Tokyo

**Supplemental Table 1 List of bacterial strains and plasmids used in this study**

| Strains or plasmids | Genotypes or characteristics                                       | Sources or references |
|---------------------|--------------------------------------------------------------------|-----------------------|
| Strains             |                                                                    |                       |
| <i>E. coli</i>      |                                                                    |                       |
| JM109               | General purpose host strain for cloning                            | Takara Bio            |
| BL21(DE3)pLysS      | General purpose host strain for expression of recombinant proteins | Takara Bio            |
| <i>S. aureus</i>    |                                                                    |                       |
| RN4220              | NCTC8325-4, restriction mutant                                     | <sup>1</sup>          |
| TSJY1               | RN4220 <i>mvaA</i> (M77I)                                          | This study            |
| TSJY2               | RN4220 <i>mvaA</i> (A335V)                                         | This study            |
| TSJY3               | RN4220 <i>mvaA</i> (C366Y)                                         | This study            |
| Plasmids            |                                                                    |                       |
| pET-28a             | T7 promoter based expression vector , Km <sup>r</sup>              | Novagen               |
| pHis-MvaA           | pET-28a with His-tagged mutated <i>mvaA</i> (Wt)                   | This study            |
| pHis-MvaA-M77I      | pET-28a with His-tagged mutated <i>mvaA</i> (M77I)                 | This study            |
| pHis-MvaA-A335V     | pET-28a with His-tagged mutated <i>mvaA</i> (A335V)                | This study            |
| pHis-MvaA-C366Y     | pET-28a with His-tagged mutated <i>mvaA</i> (C366Y)                | This study            |
| pSR515              | <i>E. coli</i> - <i>S. aureus</i> shuttle vector ; Cm <sup>r</sup> | <sup>2</sup>          |
| pSmvaA              | pSR515 with intact <i>mvaA</i> from RN4220                         | This study            |
| pCK20               | <i>S. aureus</i> integration vector ; Cm <sup>r</sup>              | <sup>3</sup>          |
| pCKmvaA-side        | pCK20 with a genome region near by <i>mvaA</i>                     | This study            |

**Supplemental Table 2 PCR primers used in this study.**

| <b>Target</b>                      | <b>Primer</b> | <b>Sequence(5'-3')</b>          |
|------------------------------------|---------------|---------------------------------|
| <i>mvaA</i> for complementation    | mvaAup25      | AAGGTTTTACATCCTTTCAAATTTATAAAAG |
|                                    | mvaAend       | CTATTGTTGTCTAATTTCTTGTA AAAATGC |
| <i>mvaA</i> for sequence           | mvaAseq1F     | CGAATATCATTGTGGACGATAAG         |
|                                    | mvaAseq1R     | CTTATCGTCCACAATGATATTCG         |
|                                    | mvaAseq2F     | TATCGTGGTATTGCAACATGG           |
|                                    | mvaAseq2R     | CCATGTTGCAATACCACGATA           |
| <i>mvaA</i> for phage transduction | Fside-mvaA    | CGCGGTACCAATTCAGAAATTCGTTTTTCA  |
|                                    | Rside-mvaA    | GCGTCTAGAGCCTATTTGACACATTATTGA  |
| MvaA for over production           | FMvaA-His     | CGCGGATCCATGCAAAGTTTAGATAAGAAT  |
|                                    | RMvaA-His     | GCGCTCGAGCTATTGTTGTCTAATTTCTTG  |
| Insert region in genome library    | p3            | GCCTCGCAGAGCATAACGG             |
|                                    | p4            | GCCTCGCAGAGCATAACGG             |

**Supplemental Table 3 Purification table for wild-type *S. aureus* MvaA protein**<sup>a</sup> 1 unit = 1 μmol of NADPH oxidized/min

| <b>Fraction</b>  | <b>Purification step</b> | <b>Total protein<br/>(mg)</b> | <b>Total activity<sup>a</sup><br/>(U)</b> | <b>Yield<br/>(%)</b> | <b>Specific activity<sup>a</sup><br/>(U/mg)</b> | <b>Fold</b> |
|------------------|--------------------------|-------------------------------|-------------------------------------------|----------------------|-------------------------------------------------|-------------|
| <b>Wild-type</b> |                          |                               |                                           |                      |                                                 |             |
| I                | Cell lysate              | 42.4                          | 316                                       | 100                  | 7.5 ± 0.2                                       | 1           |
| II               | Nickel affinity column   | 6.5                           | 933                                       | 300                  | 143 ± 1                                         | 19          |
| <b>Mock</b>      |                          |                               |                                           |                      |                                                 |             |
| I                | Cell lysate              | 45.6                          | 0                                         | -                    | 0                                               | -           |
| II               | Nickel affinity column   | 3.2                           | 0                                         | -                    | 0                                               | -           |

## Supplemental Figures

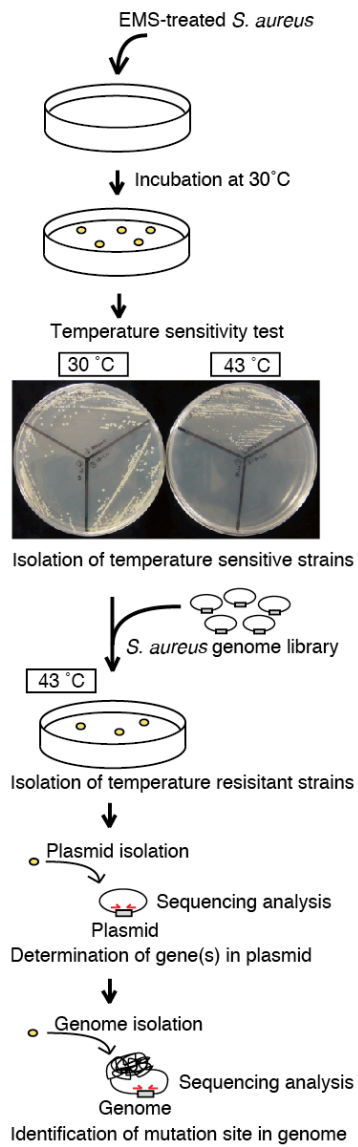

**Supplementary Figure 1. Overview of isolation method of temperature sensitive mutants in *S. aureus*.**

EMS: ethylmethanesulfonate.

|        |      |                                                     |      |
|--------|------|-----------------------------------------------------|------|
| RN4220 | 201  | TGTGGACGATAAGGCATATGTTGTACCTATGATGGTGGGAAAGGCCTTCAG | 250  |
| TSJY1  | 201  | TGTGGACGATAAGGCATATGTTGTACCTATATGGTGGGAAAGGCCTTCAG  | 250  |
| TSJY2  | 201  | TGTGGACGATAAGGCATATGTTGTACCTATGATGGTGGGAAAGGCCTTCAG | 250  |
| TSJY3  | 201  | TGTGGACGATAAGGCATATGTTGTACCTATGATGGTGGGAAAGGCCTTCAG | 250  |
| RN4220 | 971  | TCGTTGGCGGTGGTACAAAAGTATTACCAATTGCTAAAGCTTCATTAGAG  | 1020 |
| TSJY1  | 971  | TCGTTGGCGGTGGTACAAAAGTATTACCAATTGCTAAAGCTTCATTAGAG  | 1020 |
| TSJY2  | 971  | TCGTTGGCGGTGGTACAAAAGTATTACCAATTGTTAAAGTTTCATTAGAG  | 1020 |
| TSJY3  | 971  | TCGTTGGCGGTGGTACAAAAGTATTACCAATTGCTAAAGCTTCATTAGAG  | 1020 |
| RN4220 | 1081 | CAAACTTTGCAGCATGTCGCGCGCTTGTGTCAGAAGGTATTCAACAAGG   | 1130 |
| TSJY1  | 1081 | CAAACTTTGCAGCATGTCGCGCGCTTGTGTCAGAAGGTATTCAACAAGG   | 1130 |
| TSJY2  | 1081 | CAAACTTTGCAGCATGTCGCGCGCTTGTGTCAGAAGGTATTCAACAAGG   | 1130 |
| TSJY3  | 1081 | CAAACTTTGCAGCATGTCGCGCGCTTGTGTCAGAAGGTATTCAACAAGG   | 1130 |

**Supplementary Figure 2. Nucleic acid substitutions in the *S. aureus mvaA* gene of temperature-sensitive mutants.**

Red letters in the squares indicate the nucleic acid mutations in temperature-sensitive mutants, TSJY1, TSJY2, and TSJY3.

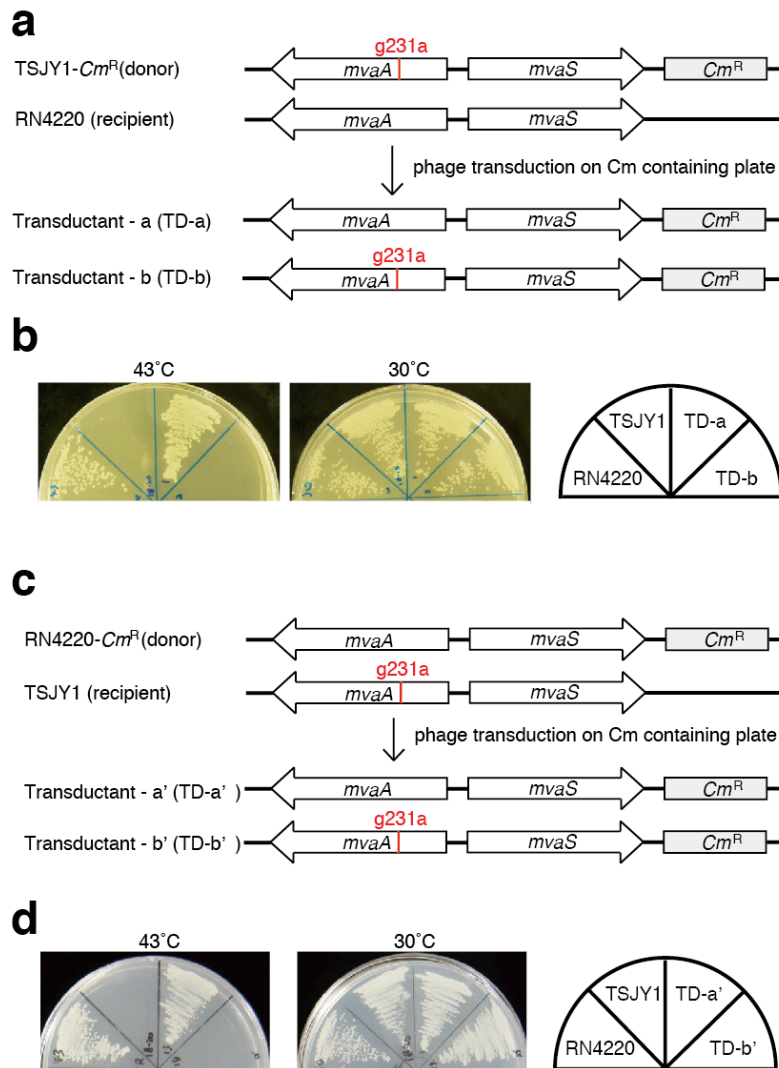

**Supplementary Figure 3. Phage transduction experiments to test the relationship between the *mvaA* gene mutations and temperature-sensitive phenotype.**

(a) Illustration of phage transduction experiments using RN4220 as a recipient and TSJY1 as a donor. The TSJY1 (*Cm<sup>r</sup>*) strain has the chloramphenicol-resistant gene inserted near the *mvaA* gene in the genome. Bacteriophage 80  $\alpha$  was used for the transduction.

(b) Overnight cultures of RN4220, TSJY1, and transductants (TD-a and TD-b) were diluted 100-fold, and streaked on LB0 agar plates. The plates were incubated at 30°C or 43°C for 24 h.

(c) Illustration of phage transduction experiments using TSJY1 as a recipient and RN4220 as a donor. The RN4220 (*Cm<sup>r</sup>*) strain has the chloramphenicol-resistant gene inserted near the *mvaA* gene in the genome. Bacteriophage 80  $\alpha$  was used for the transduction.

(d) Overnight cultures of RN4220, TSJY1, and transductants (TD-a' and TD-b') were diluted to 100-fold, and streaked on LB0 agar plates. The plates were incubated at 30°C or 43°C for 24 h.

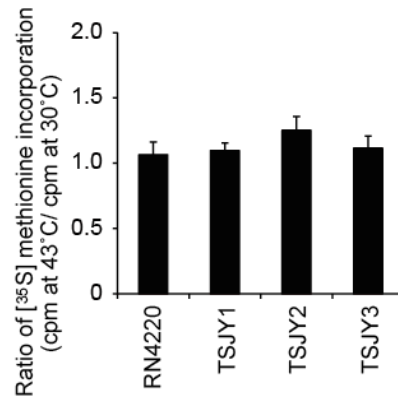

**Supplementary Figure 4. Effect of temperature shift on protein synthesis of wild-type and *mvaA* mutants.**

Overnight cultures of RN4220 (wild-type), TSJY1, TSJY2, and TSJY3 were diluted 100-fold and further incubated at 30°C or 43°C for 5 h. Five-hour incubated cultures were adjusted to OD<sub>600</sub> = 1.0 in LB0, followed by incubation with [<sup>35</sup>S]methionine at 30°C or 43°C for 15 min, respectively.



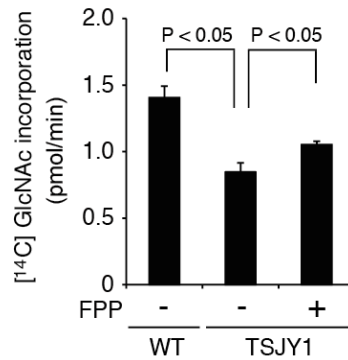

**Supplementary Figure 5. Suppression of decrease in peptidoglycan synthesis in the *mvaA* mutant (TSJY1) by the addition of farnesyl diphosphate.**

Overnight cultures of RN4220 (wild-type) and TSJY1 were diluted 1000-fold, and further incubated at 43°C. Cultures ( $OD_{600} = 0.1-0.5$ ) were adjusted to  $OD_{600} = 0.5$  in cell wall synthesis medium (CWSM) containing chloramphenicol (100  $\mu\text{g/ml}$ ), followed by incubation with [<sup>14</sup>C]N-acetyl glucosamine with or without farnesyl diphosphate (100  $\mu\text{M}$ ) in CWSM containing chloramphenicol (100  $\mu\text{g/ml}$ ) at 43°C for 30 min. Peptidoglycan synthesis was measured by [<sup>14</sup>C]N-acetyl glucosamine incorporation. FPP: farnesyl diphosphate.



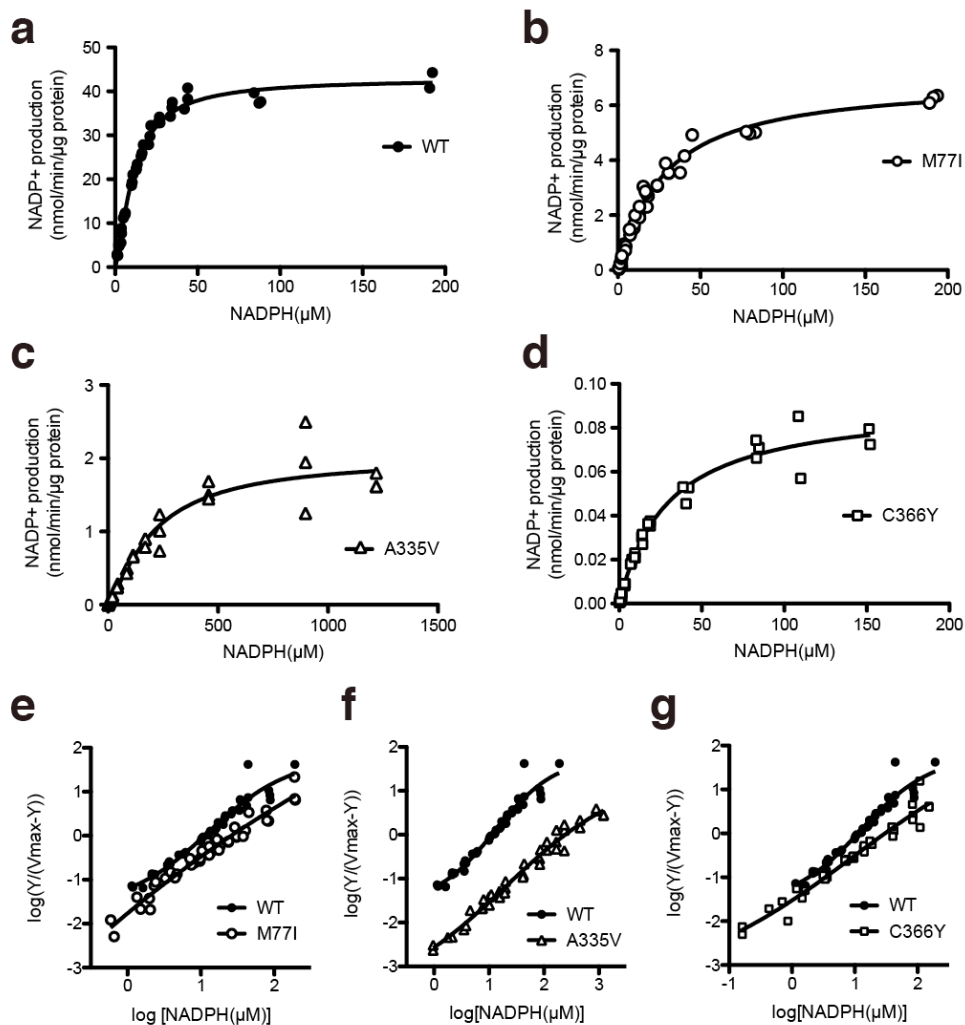

**Supplementary Figure 7. Dependency on NADPH concentrations of HMG-CoA reductase reactions by wild-type, M77I, A335V, or C366Y mutant MvaA protein.**

(a-d) Wild-type, M77I, A335V, or C366Y mutant MvaA proteins were added to a reaction mixture with different concentrations of NADPH. The reaction was performed at 30°C for 30 min. The amount of NADP+ produced in each sample was measured.

(e-g) Hill plots for NADPH of HMG-CoA reductase activity of wild-type, M77I, A335V, or C366Y mutant protein.

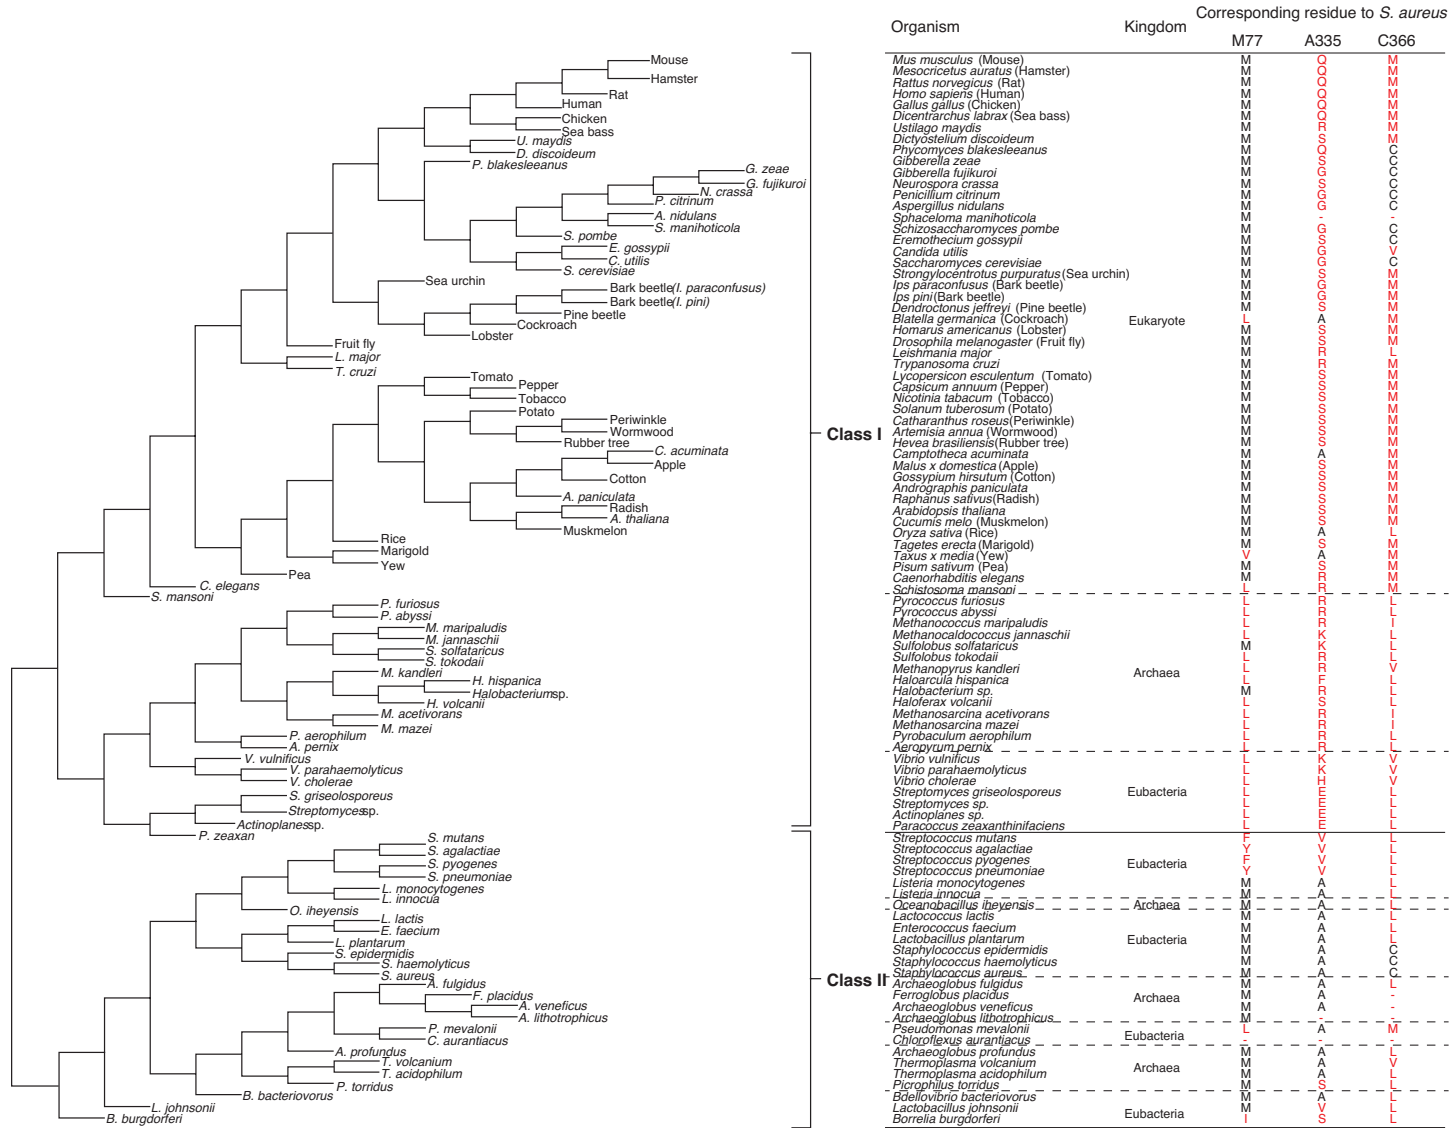

**Supplementary Figure 8. Evolutionary tree of HMG-CoA reductase and conservation of M77, A335, and C366 of *S. aureus* MvaA.** Phylogenetic tree and Kingdom were based on the study of Friesen and Rodwell <sup>4</sup>. Amino acid residues corresponding to M77, A335, and C366 of *S. aureus* MvaA are shown in the right column. Non-conserved residues corresponding to M77, A335, and C366 of *S. aureus* MvaA are indicated in red letters.

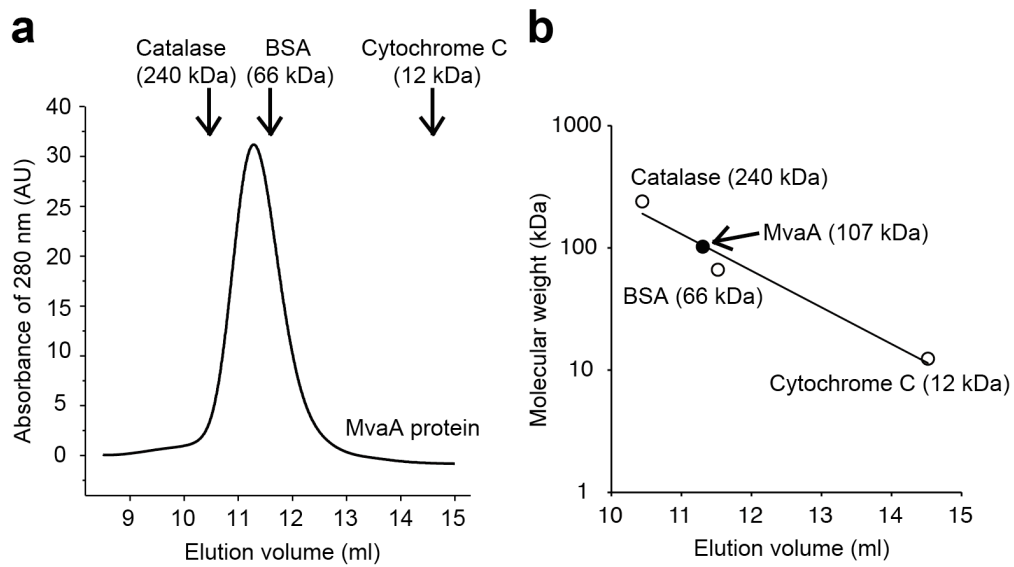

**Supplementary Figure 9. Gel filtration of MvaA protein.**

(a) Purified MvaA protein (330  $\mu$ g) was applied to a Superose 10 column and absorbance at 280 nm was monitored. Peaks of marker proteins (catalase, 240 kDa; bovine serum albumin (BSA), 66 kDa; cytochrome C, 12 kDa) are shown.

(b) Estimation of molecular weight of MvaA from the standard curve of the relationship between elution time and peaks of marker proteins (catalase, 240 kDa; BSA, 66 kDa; cytochrome C, 12 kDa).

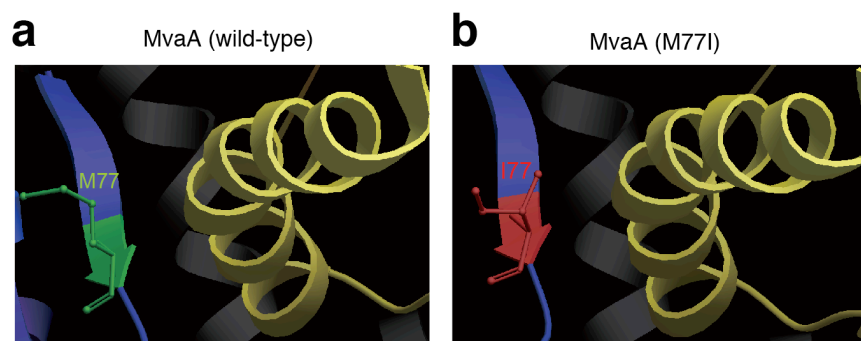

**Supplementary Figure 10. Prediction of three-dimensional structures of wild-type and M77I mutant MvaA proteins.**

The three-dimensional structures of wild-type (**a**) or M77I mutant MvaA protein (**b**) in *S. aureus* were predicted by RaptorX<sup>5,6</sup> from their primary structures. The structure (PDB ID: 1qaxA) was used as a template. RaptorX is a statistical method for template-based protein modeling<sup>5</sup>. MvaA (wild-type); best template: 1qaxA (p-value < 0.00001), overall uGDT: 351, 425 (100%) residues were modeled, secondary structure: helix (53%), beta-sheet (18%), loop (27%). MvaA (M77I); best template: 1qaxA (p-value < 0.00001), overall uGDT: 350, 425 (100%) residues were modeled, secondary structure: helix (53%), beta-sheet (19%), loop (26%). uGDT is the unnormalized GDT (Global Distance Test) score<sup>5,6</sup>. The amino acid residues of M77(**a**) or I77(**b**) are indicated in green or red, respectively.

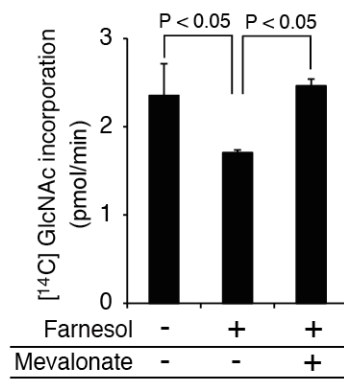

**Supplementary Figure 11. Suppression by mevalonate of the inhibitory effect of farnesol on peptidoglycan synthesis of *S. aureus*.**

Overnight culture of RN4220 (wild-type) was diluted 1000-fold, and further incubated at 37°C for 5 h. Five-hour incubated cultures were adjusted to  $OD_{600} = 0.5$  in CWSM, followed by incubation with [<sup>14</sup>C]N-acetyl glucosamine with or without farnesol at 37°C or 43°C for 30 min, respectively. Peptidoglycan synthesis was measured by [<sup>14</sup>C]N-acetyl glucosamine incorporation.

## References

- 1 Peng, H. L., Novick, R. P., Kreiswirth, B., Kornblum, J. & Schlievert, P. Cloning, characterization, and sequencing of an accessory gene regulator (*agr*) in *Staphylococcus aureus*. *Journal of bacteriology* **170**, 4365-4372 (1988).
- 2 Kaito, C., Morishita, D., Matsumoto, Y., Kurokawa, K. & Sekimizu, K. Novel DNA binding protein SarZ contributes to virulence in *Staphylococcus aureus*. *Molecular microbiology* **62**, 1601-1617, doi:10.1111/j.1365-2958.2006.05480.x (2006).
- 3 Ichihashi, N., Kurokawa, K., Matsuo, M., Kaito, C. & Sekimizu, K. Inhibitory effects of basic or neutral phospholipid on acidic phospholipid-mediated dissociation of adenine nucleotide bound to DnaA protein, the initiator of chromosomal DNA replication. *The Journal of biological chemistry* **278**, 28778-28786, doi:10.1074/jbc.M212202200 (2003).
- 4 Friesen, J. A. & Rodwell, V. W. The 3-hydroxy-3-methylglutaryl coenzyme-A (HMG-CoA) reductases. *Genome biology* **5**, 248, doi:10.1186/gb-2004-5-11-248 (2004).
- 5 Peng, J. & Xu, J. RaptorX: exploiting structure information for protein alignment by statistical inference. *Proteins* **79 Suppl 10**, 161-171, doi:10.1002/prot.23175 (2011).
- 6 Kallberg, M. *et al.* Template-based protein structure modeling using the RaptorX web server. *Nat Protoc* **7**, 1511-1522, doi:10.1038/nprot.2012.085 (2012).
